# Supplementary material for: Genetic Association between Inflammatory-Related Polymorphism in STAT3, IL-1β, IL-6, TNF-α and Idiopathic Recurrent Implantation Failure
Source: MDPI journal article supplement (doi:10.3390/genes14081588), 2023-08-05
Supplement: s1 [file s1]

**Supplementary Table S1. Statistical power of genetic association of less than 0.05 *p*-value in Table 2**

| Characteristic                                    | AOR (95% CI)        | Statistical power (%) |
|---------------------------------------------------|---------------------|-----------------------|
| <i>STAT3</i> rs1053004 AG                         | 0.623 (0.409-0.947) | 68.1                  |
| <i>STAT3</i> rs1053004 GG                         | 0.513 (0.269-0.978) | 86.7                  |
| <i>STAT3</i> rs1053004 Dominant                   | 0.601 (0.406-0.889) | 76.5                  |
| <i>IL-6</i> rs1800796 GG                          | 2.472 (1.083-5.645) | 78.3                  |
| <i>IL-6</i> rs1800796 Recessive                   | 2.374 (1.053-5.350) | 63.0                  |
| <i>TNF-<math>\alpha</math></i> rs1800629 GA       | 2.127 (1.200-3.769) | 77.2                  |
| <i>TNF-<math>\alpha</math></i> rs1800629 Dominant | 2.198 (1.246-3.878) | 80.8                  |

AOR, adjusted odds ratio.
