# Supplementary figures and images for: Genetic Association between Inflammatory-Related Polymorphism in STAT3, IL-1β, IL-6, TNF-α and Idiopathic Recurrent Implantation Failure
Source: MDPI journal article supplement (doi:10.3390/genes14081588), 2023-08-05

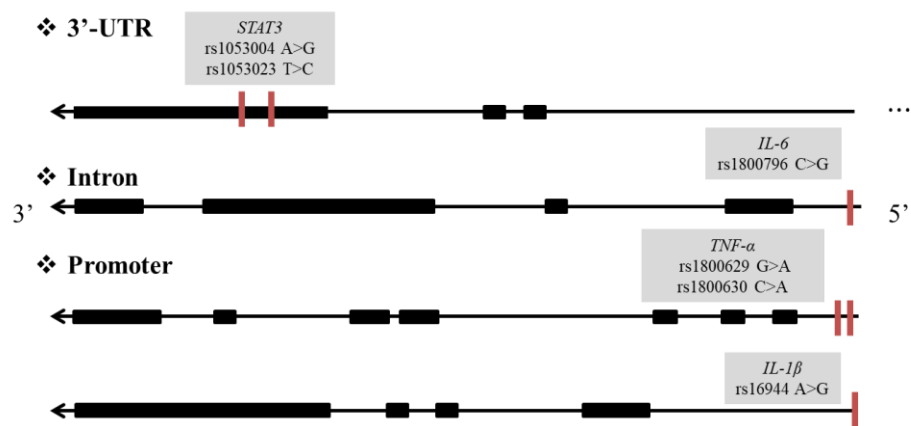

Supplementary Figure S1. Location of investigated polymorphisms

Supplement: s1 [file s1]
